# Supplementary material for: Mapping antibody footprints using binding profiles
Source: PubMed Central journal article supplement — Cell Rep Methods. 2023 Aug 22;3(8):100566. doi: 10.1016/j.crmeth.2023.100566 (PMC10475849; doi:10.1016/j.crmeth.2023.100566), 2023-08-22
Supplement: mmc1.pdf [file mmc1.pdf]

**Cell Reports Methods, Volume 3**

**Supplemental information**

**Mapping antibody footprints using binding profiles**

**Asaf Azulay, Liel Cohen-Lavi, Lilach M. Friedman, Maureen A. McGargill, and Tomer Hertz**

## Supplementary Information

**Figure S1. Characteristics of the human monoclonal antibodies used in this study.** *Related to Figure 1 and Table S1.* (A) Venn diagram of the binding profile of each of the mAbs based on previous studies (Table 2), (B) HA Head vs. HA stalk antibodies (C) Antigenic binding sites (D) antibody function: Neut+: neutralizing, Neut-: non-neutralizing, HAI+: Hemagglutinin Inhibition activity.

**Figure S2. Comparing mAb subtype specificities to their known specificities.** *Related to Figure 2.* Comparison of the subtype specificity of all 23 mAbs using AM and ELISA. Black bars denote the overall binding breadth of each mAb to the A/H1N1, A/H3N2 and B subtypes as measured using our influenza AM. mAb specificities based on previous studies are presented by the gray boxes.

**Figure S3. Inferring antigenic cartography based on mAb binding antibody profiles.** *Related to Figure 3.* The mAb binding profiles across HA strains were used to compute Euclidean distance between influenza strains and monoclonal antibodies using the Euclidean metric. Dendrograms were computed using the complete-linkage algorithm (A) Euclidean distance matrix of 35 influenza HAs from different subtypes computed over the binding profile of all 23 mAbs to each strain. The top colorbar represents the antigenic group of each strain (group 1: H1N1, H5N1, and H9N2; group 2: H3N2 and profiles to 35 HA strains (**Table S1**)). (C-D) Antigenic cartography maps based on Euclidean distance were computed using the Ramacs antigenic cartography package<sup>64</sup>. (C) Antigenic cartography of 8 H1N1 strains based on the binding profiles of 23 H1 mAbs. Influenza strains were divided into 3 known antigenic groups, annotated by color: PR8 lineage, SI06 and BRIS07 lineage and pH1N1 lineage. (D) Antigenic cartography of 23 influenza mAbs based on their binding profiles to 36 influenza A HA proteins from both human and avian subtypes (Table 2 and S2). The shape of each mAb represents its known binding profile to H1 and H3 subtypes based on AM binding profiles. The Color of each mAb represents its epitope specificity. PR8-Puerto Rico 1934, SI06-Solomon Islands 2006, BRIS07-Brisbane 2007, B Vic - B Victoria lineage, B Yam- B Yamagata lineage.

**Figure S4. Antigenic cartography of both antigens and mAbs.** *Related to Figure 3.* Antigenic cartography maps based on cosine similarity were computed jointly for 8 H1N1 strains (orange circles) and for 23 influenza mAbs based on their binding profiles. The shape of each mAb represents its known binding profile to H1 and H3 subtypes, and colors represent the epitope specificity of each mAb.

**Figure S5. Geometric mean distances from the initial patch identified by mAb patch.** *Related to Figure 5.* (A-D) Box plots of geometric mean distance from the epitope patch created by the 15 top ranked positions comparing positions within the known epitope to non-epitope positions based on solved structures for each of the mAbs. GMD-Geometric mean distance. p-value legend: ns:p <= 1, \*:0.01<p<= 0.05, \*\*:0.001<p<=0.01, \*\*\*:0.0001<p<=0.001, \*\*\*\*: p<=0.00001.

**Figure S6. Identifying mAb epitope using Z-Dock Docking tool.** *Related to Table 1.* For Each mAb with solved structure we used Z-Dock server, docking prediction tool for protein-protein interactions. (A-B) Head mAbs 045-09 2B05 and 047-09 4G02, (C-D) Stalk mAbs CR-9114 and FI6, solved structure in green/pink and Z-Dock top scored prediction in cyan/yellow.

**Table S1: Human monoclonal antibodies used in this study.** *Related to Figure 1,2 and 3 and Figure S1, S2 and S3.*

| mAb         | Binding strains | Binding region | Binding site  | Function |
|-------------|-----------------|----------------|---------------|----------|
| 008-10 5G04 | H1, H3          | Head           | Ca1           | HAI+     |
| SFV019-2A02 | H1              | Head           | Ca1           | HAI+     |
| 045-09 2B05 | H1              | Head           | Lateral Patch | HAI+     |
| 047-09 4G02 | H1, H3, B       | Head           | Lateral Patch | HAI+     |
| SFV015-2F04 | H1              | Head           | Lateral Patch | HAI+     |
| SFV009-3D04 | H1              | Stalk          | Anchor Stalk  | Neut+    |
| 029-09 4A01 | H1              | Stalk          | Central Stalk | Neut+    |
| 030-09 2B03 | H1              | Stalk          | Central Stalk | Neut+    |
| 045-09 2B06 | H1, H3, B       | Stalk          | Central Stalk | Neut+    |
| 047-09 4E01 | H1, H3, B       | Stalk          | Central Stalk | Neut-    |
| 051-09 4B02 | H1              | Stalk          | Central Stalk | Neut+    |

|             |           |       |               |       |
|-------------|-----------|-------|---------------|-------|
| 051-09 5A02 | H1        | Stalk | Central Stalk | Neut+ |
| CR-9114     | H1, H3, B | Stalk | Central Stalk | Neut+ |
| FI6         | H1, H3    | Stalk | Central Stalk | Neut+ |
| SC1000-3D04 | H1, B     | Stalk | Central Stalk | Neut+ |
| SC1009-3B05 | H1        | Stalk | Central Stalk | Neut+ |
| SC70-1F02   | H1, H3    | Stalk | Central Stalk | Neut+ |
| SC70-5B03   | H1        | Stalk | Central Stalk | Neut+ |
| SFV005-2G02 | H1, H3, B | Stalk | Central Stalk | Neut+ |
| 030-09 1E05 | H1, H3, B | Stalk | Stalk         | Neut- |
| 047-09 1G05 | H1        | Stalk | Stalk         | Neut- |
| 051-09 4A03 | H1, H3    | Stalk | Stalk         | Neut+ |
| 051-09 5A01 | H1        | Stalk | Stalk         | Neut- |

**Table S2: Additional avian influenza strains spotted on our influenza antigen microarray related to Table 2 and Figure 3 and S3.**

| <b>Virus name</b>       | <b>Subtype</b> | <b>Protein</b> | <b>Source</b> | <b>Cat#</b> | <b>Accession#</b> |
|-------------------------|----------------|----------------|---------------|-------------|-------------------|
| A/Japan/305/1957        | H2N2           | rHA            | Sino          | 11088-V08H  | AAA43185.1        |
| A/mallard/Ohio/657/2002 | H4N6           | rHA            | Sino          | 11714-V08H  | ABI47995.1        |

|                                   |       |     |      |            |            |
|-----------------------------------|-------|-----|------|------------|------------|
| A/chicken/Hong Kong/17/1977       | H6N4  | rHA | Sino | 40027-V08H | CAC84244.1 |
| A/New York/107/2003               | H7N2  | rHA | IRR  | FR-69      | N/A        |
| A/Netherlands/219/2003            | H7N7  | rHA | Sino | 11082-V08B | AAR02640.1 |
| A/pintail duck/Alberta/114/1979   | H8N4  | rHA | Sino | 11722-V08H | ABB87729.1 |
| A/mallard/Minnesota/Sg-00194/2007 | H10N3 | rHA | Sino | 40184-V08B | ACT84107.1 |
| A/mallard/Alberta/294/1977        | H11N9 | rHA | Sino | 11704-V08H | ABB87228.1 |

**Table S3: Influenza strains spotted on our influenza antigen microarray included in the multiple sequence alignment used by mAb-Patch. Related to Figure 5.**

| Virus name              | Subtype | Protein | Source | Cat#       | Accession# |
|-------------------------|---------|---------|--------|------------|------------|
| A/South Carolina/1/1918 | H1N1    | HA      | IRR    | FR-692     | AAD17229.1 |
| A/WSN/1933              | H1N1    | HA      | Sino   | 11692-V08H | ACF54598.1 |
| A/Puerto Rico/8/1934    | H1N1    | HA      | Sino   | 11684-V08H | ABD77675.1 |

|                                  |      |    |                 |                   |             |
|----------------------------------|------|----|-----------------|-------------------|-------------|
| A/Solomon Islands/3/2006         | H1N1 | HA | Sino            | 11708-V08H        | ABU99109.1  |
| A/Brisbane/59/2007               | H1N1 | HA | Sino            | 11052-V08H        | ACA28844.1  |
| A/California/07/2009             | H1N1 | HA | Sino            | 11085-V08H        | ACP41953.1  |
| A/Michigan/45/2015               | H1N1 | HA | Sino            | 40567-V08H1       | APC60198.1  |
| A/Brisbane/02/2018               | H1N1 | HA | Native Antigens | custom_EPI1440504 | EPI1440504  |
| A/Hong Kong/483/1997             | H5N1 | HA | Sino            | 11689-V08H        | AAC32099.1  |
| A/Anhui/1/2005                   | H5N1 | HA | Sino            | 11048-V08H1       | ABD28180.1  |
| A/Indonesia/5/2005               | H5N1 | HA | Sino            | 11060-V08B        | ABW06108.1  |
| A/Bar-headed goose/Qingi/14/2008 | H5N1 | HA | Sino            | 11059-V08B1       | ACL28277.1  |
| A/Guineafowl/Hong Kong/WF10/1999 | H9N2 | HA | Native Antigens | FLU-H9N2-HA-100   | AOT22363.1  |
| A/Hong Kong/1073/1999            | H9N2 | HA | Sino            | 11229-V08H        | NP_859037.1 |

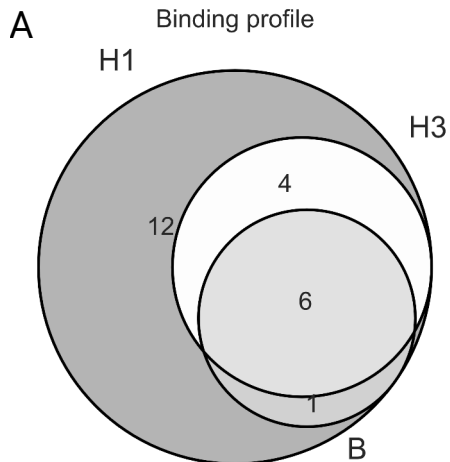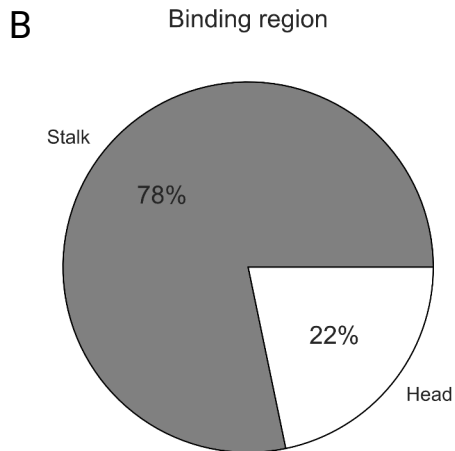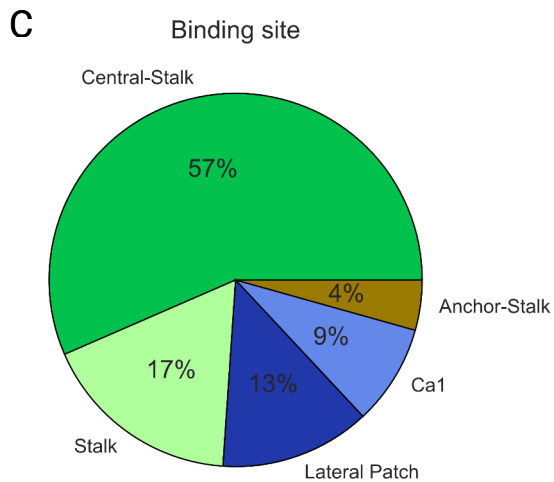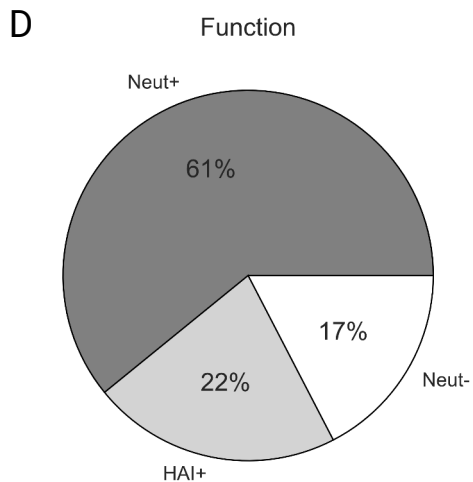

Breadth

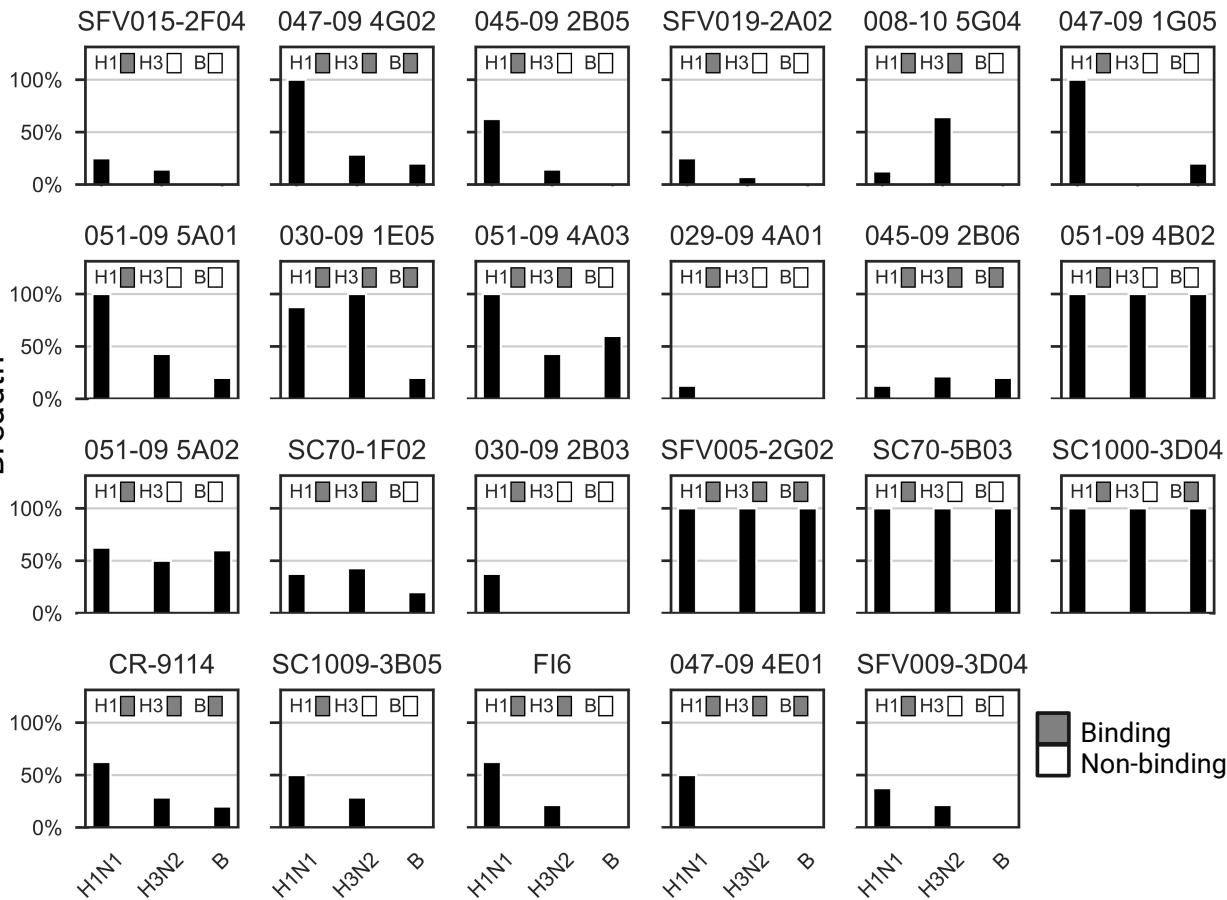



A

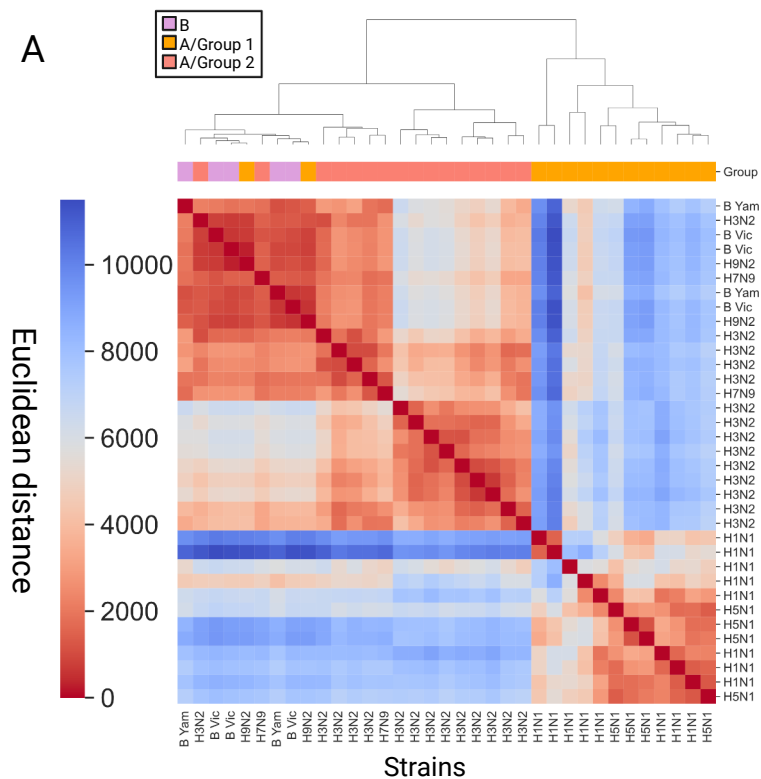

B

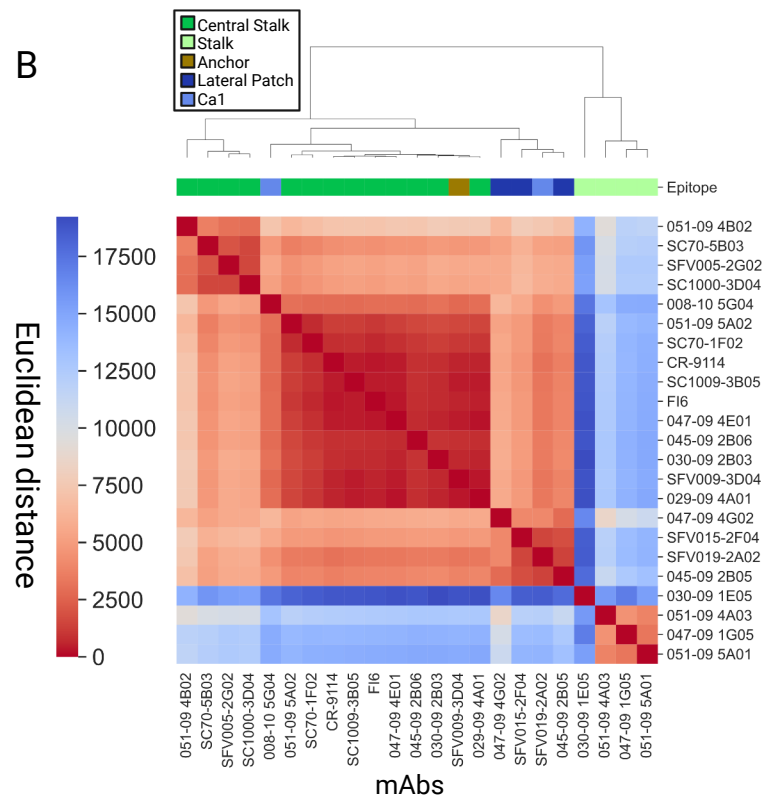

C

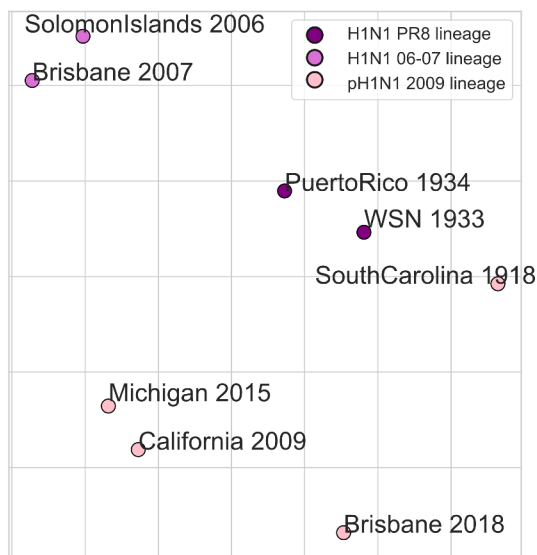

D

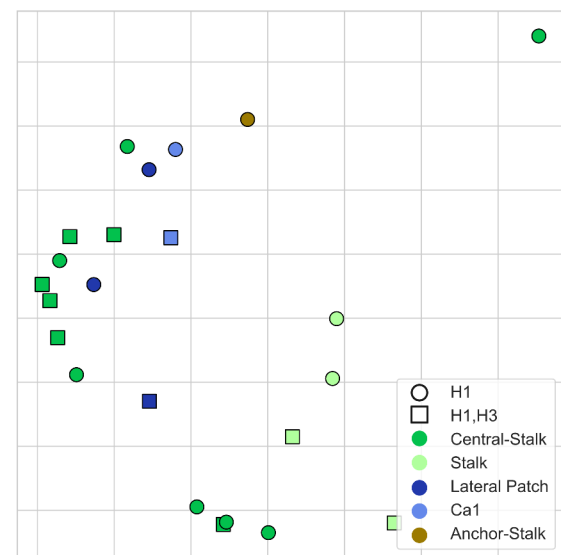

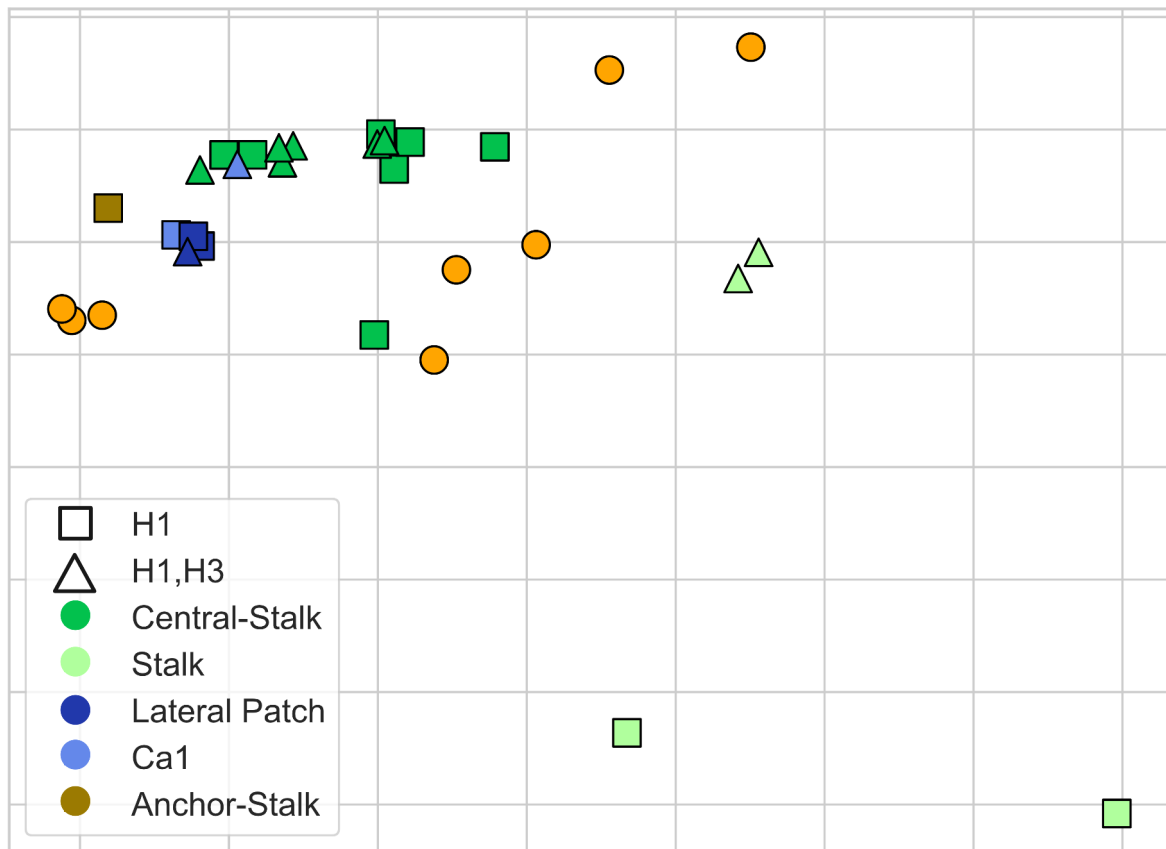

**A** 047-09 4G02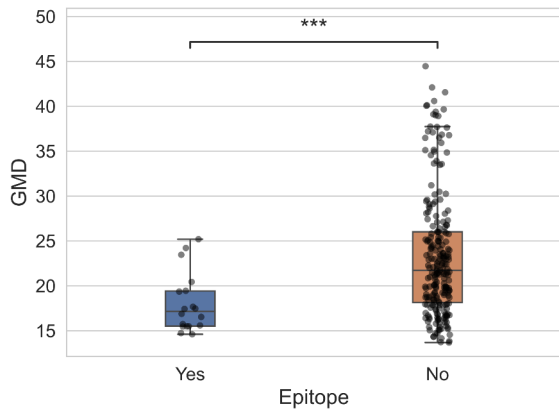**B** 045-09 2B05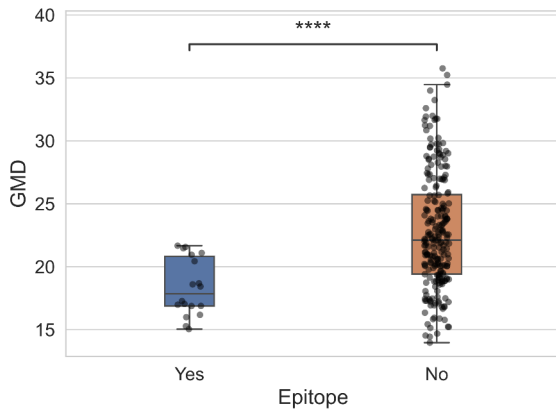**C** CR-9114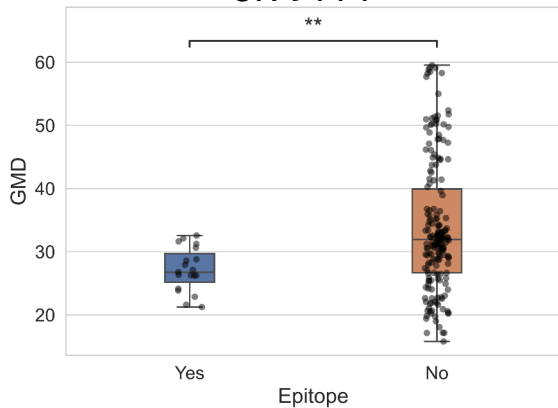**D** FI6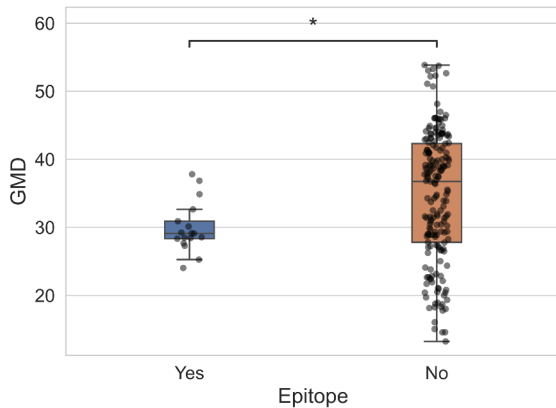

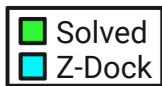

A

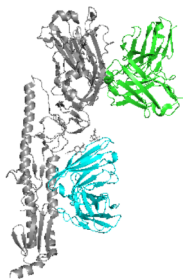

045-09 2B05 - 7MEM

B

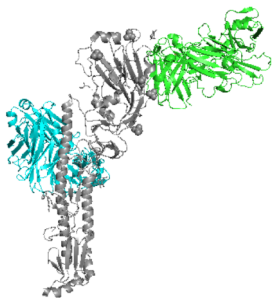

047-09 4G02 - 5W6G

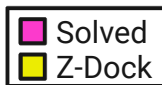

C

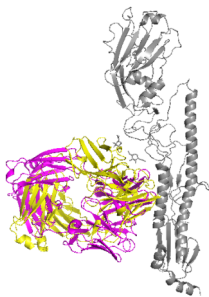

CR-9114 - 5CJS

D

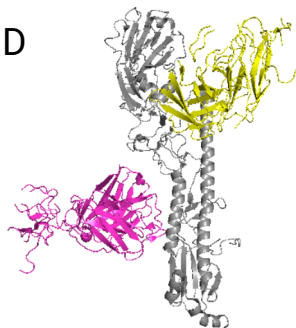

FI6 - 3ZTN
